# Supplementary material for: GPR125 (ADGRA3) is an autocleavable adhesion GPCR that traffics with Dlg1 to the basolateral membrane and regulates epithelial apicobasal polarity
Source: PubMed Central journal article supplement — J Biol Chem. 2022 Sep 9;298(10):102475. doi: 10.1016/j.jbc.2022.102475 (PMC9539791; doi:10.1016/j.jbc.2022.102475), 2022-09-09
Supplement: mmc1.pdf [file mmc1.pdf]

**Figure S1**

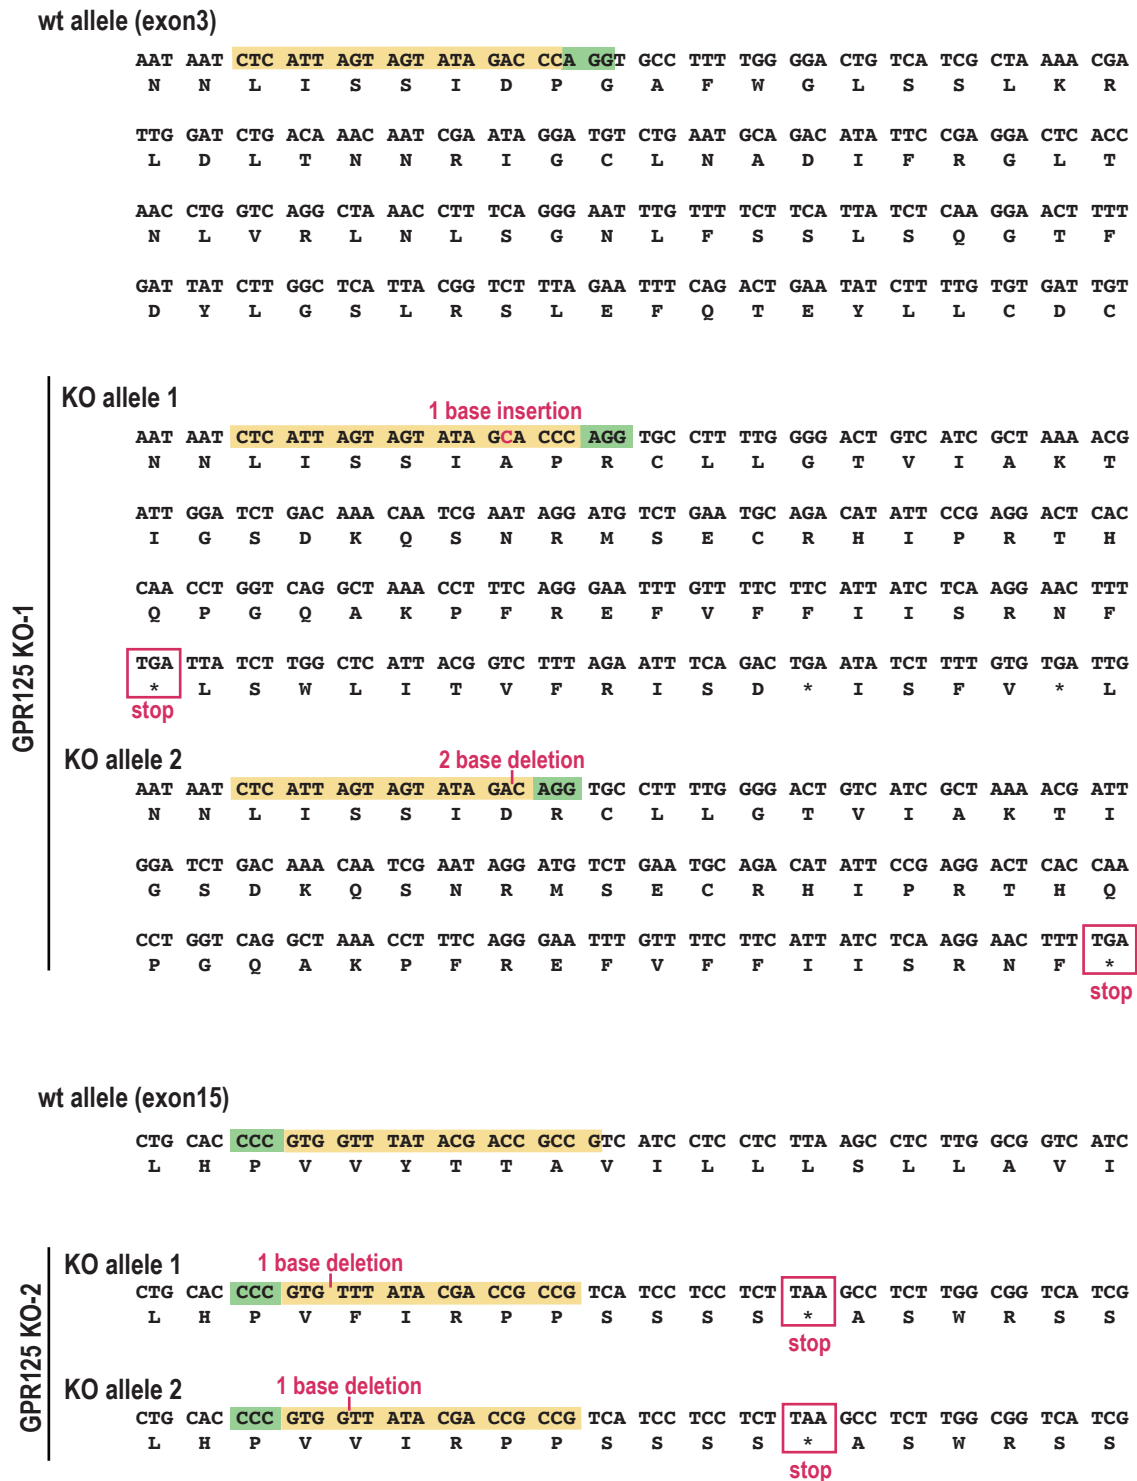

**Supplemental Figure S1.** Genomic sequence of GPR125-knockout (KO) cells revealed frameshift mutations resulting in premature stop codons (stop). The target and PAM sequences are highlighted in yellow and green, respectively (see also Fig. 7). The inserted or deleted nucleotides in KO alleles are indicated in magenta.
